# Supplementary material for: ZnO nanoparticle-functionalized WO3 plates with enhanced photoelectrochemical properties
Source: Royal Society of Chemistry journal article supplement (doi:10.1039/c5ra03918e), 2015-01-01
Supplement: c5ra03918e1.pdf [file c5ra03918e1.pdf]

## Supporting information

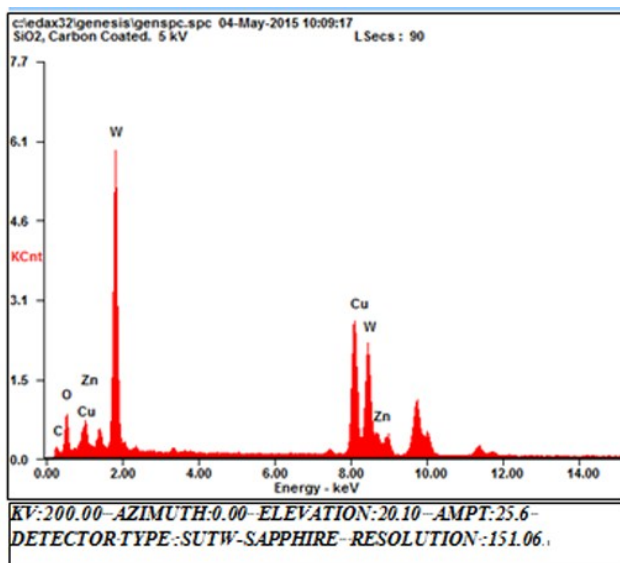

Fig. S1 EDS of WO<sub>3</sub>/ZnO

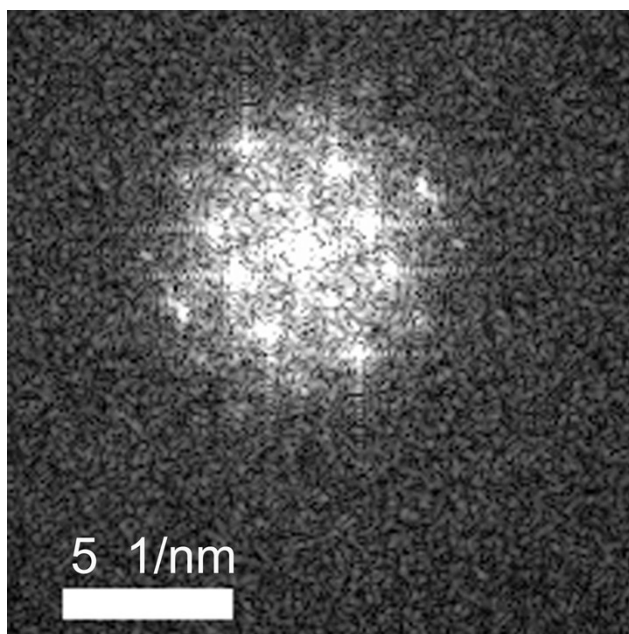

Fig. S2 SAED pattern of the WO<sub>3</sub>/ZnO

| Elem <sup>⊖</sup> | Weight % <sup>⊖</sup> | Atomic % <sup>⊖</sup> |
|-------------------|-----------------------|-----------------------|
| C-K <sup>⊖</sup>  | 01.20 <sup>⊖</sup>    | 08.90 <sup>⊖</sup>    |
| O-K <sup>⊖</sup>  | 03.70 <sup>⊖</sup>    | 21.10 <sup>⊖</sup>    |
| CuK <sup>⊖</sup>  | 20.50 <sup>⊖</sup>    | 29.60 <sup>⊖</sup>    |
| W-L <sup>⊖</sup>  | 71.20 <sup>⊖</sup>    | 35.60 <sup>⊖</sup>    |
| ZnK <sup>⊖</sup>  | 03.40 <sup>⊖</sup>    | 04.80 <sup>⊖</sup>    |

THEORETICAL KAB-ELEMENTS-MODEL-ZALUZEC.

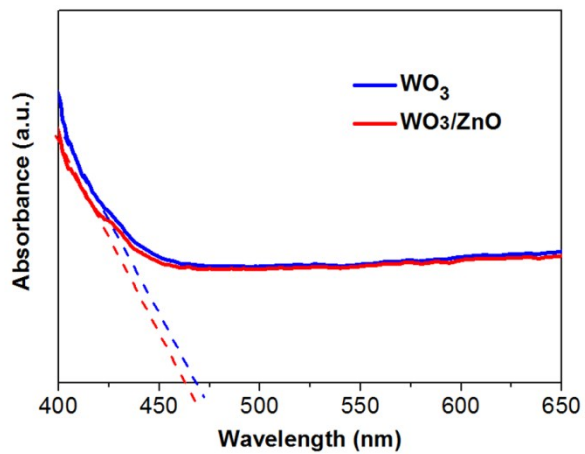

Fig. S3 UV-Vis absorbance spectroscopy of the  $\text{WO}_3$  and  $\text{WO}_3/\text{ZnO}$

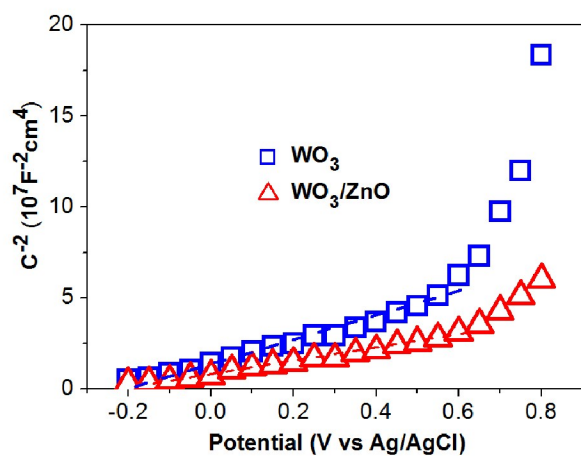

Fig. S4 Mott-Schottky plots of the  $\text{WO}_3$  and  $\text{WO}_3/\text{ZnO}$
